# Supplementary material for: Investigation of Silver Nanowire Transparent Heated Films Possessing the Application Scenarios for Electrothermal Ceramics
Source: MDPI journal article supplement (doi:10.3390/coatings13030607), 2023-03-13
Supplement: s1 [file s1]

# Supplementary Materials: Investigation of Silver Nanowire Transparent Heated Films Possessing the Application Scenarios for Electrothermal Ceramics

Yefu Hu and Weimin Wu \*

International College, Krirk University, Bangkok 10220, Thailand; huyuehui@jci.edu.cn

\* Correspondence: 2019008@cqust.edu.cn

**Table S1.** Substrates specification.

| Substrate Name           | Area            | Specification                                                                                                                                                                                                                                                                                                                                                                                                                                                |
|--------------------------|-----------------|--------------------------------------------------------------------------------------------------------------------------------------------------------------------------------------------------------------------------------------------------------------------------------------------------------------------------------------------------------------------------------------------------------------------------------------------------------------|
| Ceramic                  | 2.5 cm × 2.5 cm | The ceramic substrate is lab-made, and the process is as follows:<br>The main component of the body:<br>Al <sub>2</sub> O <sub>3</sub> about 20%, SiO <sub>2</sub> about 65%, K <sub>2</sub> O + Na <sub>2</sub> O about 5%.<br>The main component of the glaze material:<br>Al <sub>2</sub> O <sub>3</sub> about 14%, SiO <sub>2</sub> about 70%, CaO+MgO about 5%, K <sub>2</sub> O+Na <sub>2</sub> O about 6%;<br>Co <sub>2</sub> O <sub>3</sub> of 1–2%. |
|                          |                 | Sinter:<br>The body is placed in a dryer and dried for 2 h at 100 °C; then glazing was performed on the surface of the dried body with thickness of glaze layer of 0.8 mm; then the body is placed in the dryer to dry for 1.5 h at a temperature of 100 °C. After drying, body was calcined for 3 hours in a sintering furnace at 1200 °C and allowed to stand for 0.5 h.                                                                                   |
|                          |                 | Silica-boron glass.                                                                                                                                                                                                                                                                                                                                                                                                                                          |
| Glass                    | 2.5 cm × 2.5 cm |                                                                                                                                                                                                                                                                                                                                                                                                                                                              |
| Ceramic-SiO <sub>2</sub> | 2.5 cm × 2.5 cm | The ceramic-SiO <sub>2</sub> substrate is lab-made, and the process is as follows:<br>A layer of SiO <sub>2</sub> with a thickness about 680 nm was prepared on the glaze of ceramic substrate by magnetron sputtering with SiO <sub>2</sub> target (purity of 99.99%). The magnetron sputtering process was set as follows: working pressure of 1.2 Pa, power of 120 W, argon flow of 40 sccm, sputtering time of 90 min.                                   |

**Table S2.** Surface roughness Ra of transparent heating film and substrates.

| Samples                          | Ceramic/AgNW-TCF | Ceramic/AgNW@AZO-TCF |      |      |      | Ceramic Substrate | Ceramic-SiO <sub>2</sub> Substrate | Glass Substrate |
|----------------------------------|------------------|----------------------|------|------|------|-------------------|------------------------------------|-----------------|
|                                  | 1#               | 2#                   | 3#   | 4#   | 5#   |                   |                                    |                 |
| surface roughness <i>Ra</i> (nm) | 22.2             | 20.5                 | 18.7 | 21.4 | 29.9 | 8.29              | 4.20                               | 1.65            |
